# Supplementary material for: Comparison of Self-Report Questionnaire and Eye Tracking Method in the Visual Preference Study of a Youth–Beverage Model
Source: MDPI journal article supplement (doi:10.3390/foods11040505), 2022-02-10
Supplement: s1 [file s1]

Table S1. The color preferences scores of SRQ or ET measurements of different gender groups in milk samples.

| Stimulus | SRQ-man                | ET-man                  | SRQ-woman               | ET-woman               |
|----------|------------------------|-------------------------|-------------------------|------------------------|
| white    | 2.79±0.1 <sup>a</sup>  | 2.77±0.13 <sup>a</sup>  | 2.85±0.07 <sup>a</sup>  | 2.69±0.12 <sup>a</sup> |
| blue     | 2.25±0.14 <sup>b</sup> | 2.18±0.18 <sup>b</sup>  | 2.23±0.16 <sup>b</sup>  | 1.96±0.17 <sup>b</sup> |
| green    | 2.18±0.12 <sup>b</sup> | 1.93±0.15 <sup>bc</sup> | 1.96±0.16 <sup>bc</sup> | 1.92±0.15 <sup>b</sup> |
| brown    | 1.88±0.16 <sup>c</sup> | 1.86±0.14 <sup>c</sup>  | 1.77±0.14 <sup>c</sup>  | 1.65±0.12 <sup>c</sup> |
| red      | 1.63±0.15 <sup>d</sup> | 1.59±0.16 <sup>d</sup>  | 1.42±0.13 <sup>d</sup>  | 1.5±0.11 <sup>c</sup>  |

Different letters within the same column indicate significant difference ( $P < 0.05$ ). SRQ: self-report questionnaire; ET: eye tracking.

Table S2. The color preferences scores of SRQ or ET measurements of different gender groups in coffee samples.

| Stimulus | SRQ-man                | ET-man                  | SRQ-woman               | ET-woman               |
|----------|------------------------|-------------------------|-------------------------|------------------------|
| white    | 2.25±0.14 <sup>b</sup> | 2.47±0.15 <sup>ab</sup> | 2.01±0.15 <sup>b</sup>  | 2.08±0.14 <sup>b</sup> |
| blue     | 1.66±0.13 <sup>c</sup> | 1.95±0.19 <sup>cd</sup> | 1.15±0.07 <sup>d</sup>  | 1.68±0.16 <sup>c</sup> |
| green    | 1.33±0.12 <sup>d</sup> | 1.68±0.19 <sup>d</sup>  | 1.31±0.11 <sup>cd</sup> | 1.52±0.16 <sup>c</sup> |
| brown    | 2.92±0.08 <sup>a</sup> | 2.58±0.11 <sup>a</sup>  | 2.69±0.11 <sup>a</sup>  | 2.88±0.07 <sup>a</sup> |
| red      | 1.69±0.13 <sup>c</sup> | 1.76±0.15 <sup>d</sup>  | 1.5±0.15 <sup>c</sup>   | 2.05±0.15 <sup>b</sup> |

Different letters within the same column indicate significant difference ( $P < 0.05$ ). SRQ: self-report questionnaire; ET: eye tracking.

Table S3. The shape preferences scores of SRQ or ET measurements of different gender groups in milk samples.

| Stimulus | SRQ-man                | ET-man                 | SRQ-woman              | ET-woman                |
|----------|------------------------|------------------------|------------------------|-------------------------|
| circle   | 2.79±0.1 <sup>a</sup>  | 2.75±0.12 <sup>a</sup> | 2.73±0.15 <sup>a</sup> | 2.54±0.14 <sup>a</sup>  |
| hexagon  | 2.08±0.16 <sup>b</sup> | 2.2±0.12 <sup>b</sup>  | 2±0.16 <sup>b</sup>    | 2.25±0.15 <sup>b</sup>  |
| pentagon | 1.46±0.12 <sup>d</sup> | 1.75±0.16 <sup>c</sup> | 1.58±0.14 <sup>c</sup> | 2.17±0.16 <sup>bc</sup> |
| square   | 1.88±0.14 <sup>c</sup> | 2.25±0.16 <sup>b</sup> | 1.88±0.18 <sup>b</sup> | 2.08±0.17 <sup>bc</sup> |
| triangle | 1.35±0.16 <sup>d</sup> | 1.38±0.2 <sup>d</sup>  | 1.46±0.14 <sup>c</sup> | 1.9±0.13 <sup>c</sup>   |

Different letters within the same column indicate significant difference ( $P < 0.05$ ). SRQ: self-report questionnaire; ET: eye tracking.

Table S4. The shape preferences scores of SRQ or ET measurements of different gender groups in coffee samples.

| Stimulus | SRQ-man                | ET-man                  | SRQ-woman               | ET-woman                |
|----------|------------------------|-------------------------|-------------------------|-------------------------|
| circle   | 2.71±0.11 <sup>a</sup> | 2.74±0.13 <sup>a</sup>  | 2.23±0.15 <sup>a</sup>  | 2.43±0.13 <sup>a</sup>  |
| hexagon  | 2.25±0.16 <sup>b</sup> | 2.53±0.16 <sup>ab</sup> | 2.02±0.16 <sup>ab</sup> | 2.1±0.15 <sup>b</sup>   |
| pentagon | 1.96±0.14 <sup>c</sup> | 2.05±0.17 <sup>c</sup>  | 1.88±0.14 <sup>b</sup>  | 2.09±0.15 <sup>b</sup>  |
| square   | 1.83±0.13 <sup>c</sup> | 2.11±0.18 <sup>c</sup>  | 1.81±0.18 <sup>b</sup>  | 1.87±0.17 <sup>bc</sup> |
| triangle | 1.5±0.15 <sup>d</sup>  | 1.53±0.16 <sup>d</sup>  | 1.58±0.14 <sup>c</sup>  | 1.74±0.16 <sup>c</sup>  |

Different letters within the same column indicate significant difference ( $P < 0.05$ ). SRQ: self-report questionnaire; ET: eye tracking.

Table S5. The color preferences scores of SRQ or ET measurements of different BMI groups in milk samples.

| Stimulus | SRQ-UW                 | SRQ-NW                 | SRQ-OW                 | ET-UW                  | ET-NW                  | ET-OW                  |
|----------|------------------------|------------------------|------------------------|------------------------|------------------------|------------------------|
| white    | 2.83±0.17 <sup>a</sup> | 2.78±0.15 <sup>a</sup> | 2.86±0.19 <sup>a</sup> | 2.65±0.17 <sup>a</sup> | 2.76±0.14 <sup>a</sup> | 2.79±0.15 <sup>a</sup> |
| blue     | 2.39±0.09 <sup>b</sup> | 2.11±0.17 <sup>b</sup> | 2.21±0.11 <sup>b</sup> | 2.06±0.2 <sup>b</sup>  | 2.12±0.21 <sup>b</sup> | 2±0.26 <sup>b</sup>    |
| green    | 2.06±0.14 <sup>c</sup> | 2±0.15 <sup>b</sup>    | 2.21±0.11 <sup>b</sup> | 1.76±0.18 <sup>c</sup> | 1.94±0.18 <sup>b</sup> | 2±0.18 <sup>b</sup>    |
| brown    | 1.83±0.1 <sup>d</sup>  | 1.72±0.08 <sup>c</sup> | 1.93±0.19 <sup>c</sup> | 1.59±0.17 <sup>c</sup> | 1.71±0.11 <sup>c</sup> | 2±0.18 <sup>b</sup>    |
| red      | 1.5±0.16 <sup>e</sup>  | 1.56±0.17 <sup>d</sup> | 1.5±0.23 <sup>d</sup>  | 1.24±0.11 <sup>d</sup> | 1.71±0.14 <sup>c</sup> | 1.71±0.22 <sup>c</sup> |

Different letters within the same column indicate significant difference ( $P < 0.05$ ). SRQ: self-report questionnaire; ET: eye tracking; BMI: body mass index.

Table S6. The color preferences scores of SRQ or ET measurements of different BMI groups in coffee samples.

| Stimulus | SRQ-UW                 | SRQ-NW                 | SRQ-OW                 | ET-UW                  | ET-NW                  | ET-OW                   |
|----------|------------------------|------------------------|------------------------|------------------------|------------------------|-------------------------|
| white    | 1.83±0.17 <sup>b</sup> | 2.44±0.15 <sup>b</sup> | 2.21±0.19 <sup>b</sup> | 1.94±0.19 <sup>b</sup> | 2.5±0.13 <sup>b</sup>  | 2.36±0.2 <sup>b</sup>   |
| blue     | 1.21±0.09 <sup>c</sup> | 1.56±0.17 <sup>c</sup> | 1.21±0.11 <sup>d</sup> | 1.46±0.2 <sup>c</sup>  | 1.87±0.18 <sup>d</sup> | 1.96±0.26 <sup>c</sup>  |
| green    | 1.31±0.14 <sup>c</sup> | 1.44±0.15 <sup>c</sup> | 1.21±0.11 <sup>d</sup> | 1.61±0.21 <sup>c</sup> | 1.64±0.2 <sup>de</sup> | 1.5±0.23 <sup>d</sup>   |
| brown    | 2.78±0.1 <sup>a</sup>  | 2.89±0.08 <sup>a</sup> | 2.71±0.19 <sup>a</sup> | 2.88±0.08 <sup>a</sup> | 2.71±0.11 <sup>a</sup> | 2.64±0.13 <sup>a</sup>  |
| red      | 1.61±0.16 <sup>b</sup> | 1.56±0.17 <sup>c</sup> | 1.64±0.23 <sup>c</sup> | 1.5±0.18 <sup>c</sup>  | 2.07±0.15 <sup>c</sup> | 2.14±0.21 <sup>bc</sup> |

Different letters within the same column indicate significant difference ( $P < 0.05$ ). SRQ: self-report questionnaire; ET: eye tracking; BMI: body mass index.

Table S7. The shape preferences scores of SRQ or ET measurements of different BMI groups in milk samples.

| Stimulus | SRQ-UW                 | SRQ-NW                  | SRQ-OW                  | ET-UW                   | ET-NW                  | ET-OW                   |
|----------|------------------------|-------------------------|-------------------------|-------------------------|------------------------|-------------------------|
| circle   | 2.61±0.14 <sup>a</sup> | 2.89±0.08 <sup>a</sup>  | 2.79±0.15 <sup>a</sup>  | 2.53±0.16 <sup>a</sup>  | 2.71±0.15 <sup>a</sup> | 2.83±0.11 <sup>a</sup>  |
| hexagon  | 2.27±0.15 <sup>b</sup> | 1.94±0.17 <sup>b</sup>  | 1.93±0.16 <sup>b</sup>  | 2.4±0.21 <sup>ab</sup>  | 1.94±0.17 <sup>b</sup> | 2.17±0.11 <sup>bc</sup> |
| pentagon | 1.71±0.16 <sup>c</sup> | 1.41±0.14 <sup>c</sup>  | 1.5±0.14 <sup>c</sup>   | 2.01±0.19 <sup>bc</sup> | 1.74±0.19 <sup>c</sup> | 1.67±0.19 <sup>d</sup>  |
| square   | 1.83±0.19 <sup>c</sup> | 2.06±0.19 <sup>b</sup>  | 1.71±0.16 <sup>bc</sup> | 2.13±0.22 <sup>b</sup>  | 2.06±0.21 <sup>b</sup> | 2.33±0.19 <sup>b</sup>  |
| triangle | 1.33±0.14 <sup>d</sup> | 1.56±0.18 <sup>cd</sup> | 1.29±0.16 <sup>d</sup>  | 1.33±0.16 <sup>d</sup>  | 1.47±0.19 <sup>d</sup> | 2.17±0.27 <sup>bc</sup> |

Different letters within the same column indicate significant difference ( $P < 0.05$ ). SRQ: self-report questionnaire; ET: eye tracking; BMI: body mass index.

Table S8. The shape preferences scores of SRQ or ET measurements of different BMI groups in coffee samples.

| Stimulus | SRQ-UW                  | SRQ-NW                 | SRQ-OW                 | ET-UW                   | ET-NW                  | ET-OW                  |
|----------|-------------------------|------------------------|------------------------|-------------------------|------------------------|------------------------|
| circle   | 2.28±0.18 <sup>a</sup>  | 2.5±0.17 <sup>a</sup>  | 2.64±0.17 <sup>a</sup> | 2.44±0.18 <sup>a</sup>  | 2.63±0.15 <sup>a</sup> | 2.73±0.13 <sup>a</sup> |
| hexagon  | 2.17±0.19 <sup>ab</sup> | 2.17±0.2 <sup>b</sup>  | 2.21±0.21 <sup>b</sup> | 2.38±0.2 <sup>a</sup>   | 2.31±0.19 <sup>b</sup> | 2.35±0.15 <sup>b</sup> |
| pentagon | 2.06±0.15 <sup>ab</sup> | 1.88±0.17 <sup>c</sup> | 1.93±0.2 <sup>bc</sup> | 1.94±0.16 <sup>b</sup>  | 2.15±0.21 <sup>b</sup> | 1.91±0.2 <sup>c</sup>  |
| square   | 1.72±0.19 <sup>c</sup>  | 1.99±0.2 <sup>bc</sup> | 1.86±0.18 <sup>c</sup> | 1.63±0.17 <sup>c</sup>  | 2.21±0.19 <sup>b</sup> | 1.91±0.27 <sup>c</sup> |
| triangle | 1.56±0.17 <sup>cd</sup> | 1.67±0.2 <sup>cd</sup> | 1.36±0.13 <sup>d</sup> | 1.75±0.21 <sup>bc</sup> | 1.38±0.15 <sup>d</sup> | 1.82±0.22 <sup>c</sup> |

Different letters within the same column indicate significant difference ( $P < 0.05$ ). SRQ: self-report questionnaire; ET: eye tracking; BMI: body mass index.
